# Supplementary material for: Interactions with Microbial Proteins Driving the Antibacterial Activity of Flavonoids
Source: MDPI journal article supplement (doi:10.3390/pharmaceutics13050660), 2021-05-05
Supplement: s1 [file s1]

# Supplementary Materials: Interactions with Microbial Proteins Driving the Antibacterial Activity of Flavonoids

Giuliana Donadio, Francesca Mensitieri, Valentina Santoro, Valentina Parisi, Maria Laura Bellone, Nunziatina De Tommasi, Viviana Izzo and Fabrizio Dal Pia

**Table 1.** Antimicrobial flavonoids and their respective molecular targets.

| Compound name         | Structure                                                                           | Bacterial strain                                          | Target                                                               | Reference |
|-----------------------|-------------------------------------------------------------------------------------|-----------------------------------------------------------|----------------------------------------------------------------------|-----------|
| 3,6-dihydroxyflavone  | 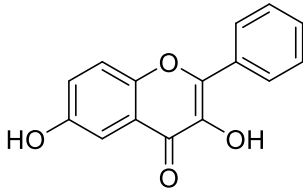   | <i>E. coli</i>                                            | Inhibition of $\beta$ -ketoacyl acyl carrier protein (ACP) synthases | [83]      |
| 5'-methoxyhydnocarpin |   | <i>S. aureus</i>                                          | Inhibition of MDR-NorA efflux pump                                   | [57]      |
| 7,4'-dimethylapigenin |  | <i>S. aureus</i>                                          | Inhibition of NorA efflux pump                                       | [53]      |
| Apigenin              |  | <i>E. coli</i>                                            | Partial inhibition of ATP synthase                                   | [81]      |
|                       |                                                                                     | <i>S. aureus</i>                                          | Inhibition of efflux pump                                            | [44]      |
|                       |                                                                                     | <i>S. aureus</i>                                          | Inhibition of NorA efflux pump                                       | [53]      |
| Artonin I             |  | <i>S. aureus</i>                                          | Inhibition of efflux pump<br>Membrane damage                         | [56]      |
| Baicalein             |  | <i>M. smegmatis</i> , <i>M. aurum</i> and <i>M. bovis</i> | Inhibition of efflux pump                                            | [58]      |
|                       |                                                                                     | <i>E. coli</i>                                            | Inhibition of ATP synthase                                           | [81]      |

|                  |                                                                                     |                                       |                                                                                                               |       |
|------------------|-------------------------------------------------------------------------------------|---------------------------------------|---------------------------------------------------------------------------------------------------------------|-------|
|                  | 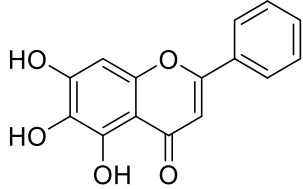   | <i>L. monocytogenes</i>               | Inhibition of listeriolysin O                                                                                 | [98]  |
|                  |                                                                                     | <i>P. aeruginosa</i>                  | Interaction with LasR and PiIT                                                                                | [109] |
| Biochanin A      |    | <i>M. smegmatis</i>                   | Inhibition of MDR efflux pump                                                                                 | [44]  |
|                  |                                                                                     | <i>E. coli</i>                        | Membrane perturbation                                                                                         | [69]  |
| (+) -Catechin    |    | <i>B. subtilis</i> and <i>E. coli</i> | ROS regulation<br>Membrane perturbation                                                                       | [63]  |
|                  |                                                                                     | MRSA MSSA <i>S. aureus</i>            | Decrease of SOD and CAT activity                                                                              | [64]  |
|                  |                                                                                     | <i>E. coli</i>                        | Membrane perturbation                                                                                         | [69]  |
| Chrysin          |    | <i>E. coli</i>                        | Partial inhibition of ATP synthase                                                                            | [81]  |
|                  |                                                                                     | <i>L. monocytogenes</i>               | Inhibition of listeriolysin O                                                                                 | [98]  |
|                  |                                                                                     | <i>P. aeruginosa</i>                  | Interaction with LasR and PiIT                                                                                | [109] |
| Cirsimaritin     |   | <i>S. aureus</i>                      | Inhibition of NorA efflux pump                                                                                | [53]  |
| Daidzein         |  | <i>E. coli</i>                        | Weak Inhibition of ATP synthase                                                                               | [81]  |
| Dihydroquercetin |  | <i>E. coli</i> and <i>S. aureus</i>   | Inhibition of $\beta$ -ketoacyl ACP reductase, 3R-hydroxyacyl ACP dehydratase and trans 2-enoyl ACP reductase | [68]  |
|                  |                                                                                     | <i>C. violaceum</i>                   | Interaction with CviR protein                                                                                 | [112] |
| Diosmin          |  | <i>E. coli</i>                        | Partial inhibition of ATP synthase                                                                            | [81]  |

|                              |                                                                                     |                         |                                                                                                                         |         |
|------------------------------|-------------------------------------------------------------------------------------|-------------------------|-------------------------------------------------------------------------------------------------------------------------|---------|
| (-)-Epicatechin              | 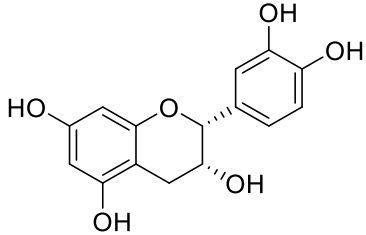   | <i>E. coli</i>          | Inhibition of ATP synthase                                                                                              | [78,81] |
| (-)-Epicatechin gallate      |    | <i>E. coli</i>          | Inhibition of DNA gyrase (sub GyrB)                                                                                     | [115]   |
| (-)-Epigallocatechin         |   | <i>E. coli</i>          | Inhibition of DNA gyrase (sub GyrB)                                                                                     | [115]   |
| (-)-Epigallocatechin gallate |  | <i>E. coli</i>          | Inhibition of DNA gyrase (sub GyrB)                                                                                     | [115]   |
| Fisetin                      |  | <i>L. monocytogenes</i> | Inhibition of listeriolysin O                                                                                           | [98]    |
| Flavone                      |  | <i>S. aureus</i>        | Inhibition of expression of the gene encoding for $\alpha$ -hemolysin (Hla)<br>Inhibition of staphyloxanthin production | [96]    |
| Galangin                     |  | <i>E. coli</i>          | Weak inhibition of ATP synthase                                                                                         | [81]    |

|                  |                                                                                     |                              |                                                                                                               |      |
|------------------|-------------------------------------------------------------------------------------|------------------------------|---------------------------------------------------------------------------------------------------------------|------|
| Genistein        | 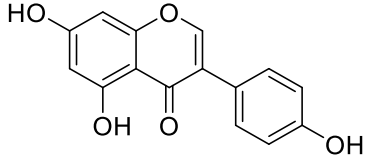   | <i>E. coli</i>               | Partial Inhibition of ATP synthase                                                                            | [81] |
| Genkwanin        |    | <i>S. aureus</i>             | Inhibition of NorA efflux pump                                                                                | [53] |
| Hesperidin       |   | <i>E. coli</i>               | Partial inhibition of ATP synthase                                                                            | [81] |
| Hesperetin       |   | <i>E. coli</i>               | Membrane perturbation                                                                                         | [69] |
| Kaempferol       |  | <i>E. coli</i>               | Partial inhibition of ATP synthase                                                                            | [81] |
|                  |                                                                                     | <i>E. coli and S. aureus</i> | Membrane perturbation                                                                                         | [68] |
|                  |                                                                                     | <i>E. coli</i>               |                                                                                                               | [69] |
|                  |                                                                                     | <i>S. aureus</i>             | Inhibition of efflux pump                                                                                     | [52] |
| Kurarinol        |  | <i>S aureus</i>              | Inhibition of Sortase A                                                                                       | [91] |
| Leucodelphinidin |  | <i>E. coli and S. aureus</i> | Inhibition of $\beta$ -ketoacyl ACP reductase, 3R-hydroxyacyl ACP dehydratase and trans 2-enoyl ACP reductase | [68] |

|            |                                                                                     |                                                             |                                                                                                                 |            |
|------------|-------------------------------------------------------------------------------------|-------------------------------------------------------------|-----------------------------------------------------------------------------------------------------------------|------------|
| Lonicerin  | 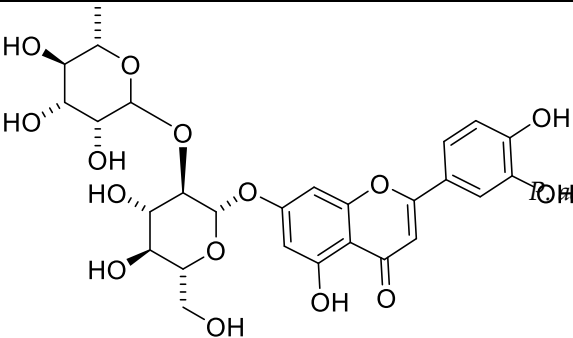   | <i>P. aeruginosa</i>                                        | Inhibition of alginate production protein AlgE                                                                  | [92]       |
| Luteolin   |    | <i>E. coli</i>                                              | Weak inhibition of ATP synthase                                                                                 | [81]       |
|            |                                                                                     | <i>S. aureus</i>                                            | Inhibition of staphyloxanthin production                                                                        | [96]       |
|            |                                                                                     | <i>E. coli</i>                                              | Inhibition of assembly of amyloid curli fibers                                                                  | [111]      |
| Morin      |   | <i>E. coli</i>                                              | Inhibition of ATP synthase                                                                                      | [78,79,81] |
|            |                                                                                     | <i>L. monocytogenes</i>                                     | Inhibition of listeriolysin O                                                                                   | [98]       |
|            |                                                                                     | <i>E. coli</i>                                              | Inhibition of assembly of amyloid curli fibers                                                                  | [111]      |
| Morusin    |  | <i>S. aureus</i> and <i>S. enterica</i>                     | Downregulation of expression levels of different subunit of the fatty-acid-synthase (fabD, fabF, fabG and fabH) | [74]       |
| Myricetin  |  | <i>L. monocytogenes</i>                                     | Inhibition of listeriolysin O                                                                                   | [98]       |
|            |                                                                                     | <i>S. aureus</i>                                            | Inhibition of efflux pump                                                                                       | [44,51]    |
|            |                                                                                     | <i>E. coli</i>                                              | Inhibition of assembly of amyloid curli fibers                                                                  | [111]      |
|            |                                                                                     | <i>E. coli</i>                                              | Inhibition of cellular functions of DnaK                                                                        | [102]      |
| Naringenin |  | <i>B. subtilis</i>                                          | Inhibition of assembly of amyloid curli fibers                                                                  | [111]      |
| Nobiletin  |  | <i>M. smegmatis</i> , <i>M. aurum</i> , and <i>M. bovis</i> | Inhibition of efflux pump                                                                                       | [58]       |
| Phloretin  |  | <i>B. subtilis</i>                                          | Inhibition of assembly of amyloid curli fibers                                                                  | [111]      |

|                    |                                                                                     |                                                             |                                                                                                               |         |
|--------------------|-------------------------------------------------------------------------------------|-------------------------------------------------------------|---------------------------------------------------------------------------------------------------------------|---------|
| Quercetin          | 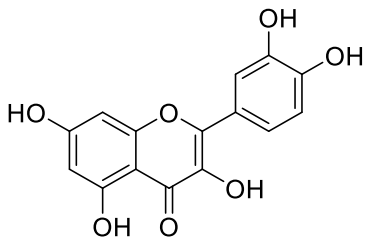   | <i>E. coli</i> and <i>S. aureus</i>                         | Inhibition of $\beta$ -ketoacyl ACP reductase, 3R-hydroxyacyl ACP dehydratase and trans 2-enoyl ACP reductase | [68]    |
|                    |                                                                                     | <i>E. coli</i>                                              | Inhibition of assembly of amyloid curli fibers                                                                | [111]   |
|                    |                                                                                     | <i>E. coli</i>                                              | Inhibition DNA gyrase (sub GyrB)                                                                              | [72]    |
|                    |                                                                                     | <i>E. coli</i>                                              | Inhibition of ATP synthase                                                                                    | [78,79] |
|                    |                                                                                     | <i>P. aeruginosa</i>                                        | Interaction with PilT and LasR                                                                                | [109]   |
| Rhamnetin          |    | <i>S. aureus</i>                                            | Inhibition of efflux pump                                                                                     | [52]    |
| Rutin              |   | <i>E. coli</i>                                              | Partial inhibition of ATP synthase                                                                            | [81]    |
| Silibinin          |  | <i>E. coli</i>                                              | Inhibition of ATP synthase                                                                                    | [81]    |
| Silymarin          |  | <i>E. coli</i>                                              | Inhibition of ATP synthase                                                                                    | [81]    |
| Skullcapflavone II |  | <i>M. smegmatis</i> , <i>M. aurum</i> , and <i>M. bovis</i> | Inhibition of efflux pump                                                                                     | [58]    |

|                         |                                                                                    |                                                             |                                |      |
|-------------------------|------------------------------------------------------------------------------------|-------------------------------------------------------------|--------------------------------|------|
| Tangeretin              | 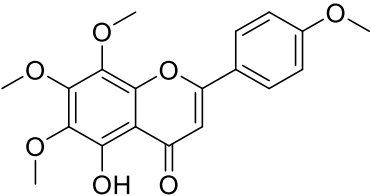  | <i>M. smegmatis</i> , <i>M. aurum</i> , and <i>M. bovis</i> | Inhibition of efflux pump      | [58] |
| Tetramethylscutellarein |   | <i>S. aureus</i>                                            | Inhibition of NorA efflux pump | [53] |
| Trimethylapigenin       |   | <i>S. aureus</i>                                            | Inhibition of NorA efflux pump | [53] |
| Wogonin                 |  | <i>M. smegmatis</i> , <i>M. aurum</i> , and <i>M. bovis</i> | Inhibition of efflux pump      | [58] |
